# Supplementary material
Source: ML conference proceedings conference paper supplement (https://openreview.net/forum?id=Z3nbvxUat0)
Supplement: supplementary_material [file attachment]

## A CODE AVAILABILITY

The Gen-POMCP implementation is available here: <https://anonymous.4open.science/r/GenPlan-FBCD/README.md>

## B PERFORMANCE BOUNDS FOR STRUCTURE-BASED PLANNING

In structured environments Gen-POMCP can explore the environment faster than Naive-POMCP (using fewer rollouts and in less time) by taking advantage of limited resources. However, it simplifies the planning problem by entirely exploring each fragment it enters before moving to the next. This heuristic can result in longer overall paths taken to search the environments. It is reasonable to ask by how much the global Naive-POMCP can actually improve on the path length taken by Gen-POMCP (and specifically the Structure-Based Planner).

Below we sketch a proof that considers the limit in which each planner fully optimizes its respective objective: Naive-POMCP follows the Bayes-optimal plan in each fragment and Gen-POMCP follows the Bayes-optimal global policy for the maze. We bound the cost difference according to the worst-case cost in steps.

**Expected and worst-case** The expected number of steps it takes for a policy to explore a maze is the average over the length of path this policy takes to reach uniformly sampled exit locations. The worst-case number of steps is the largest number of steps that the policy could take for some exit position. This is bounded below by the number of steps required to fully explore the maze.

**Lemma 1.** *There exists a fragment of size  $n \times n$  which takes  $O(n^2)$  steps to search in expectation, and to explore fully.*

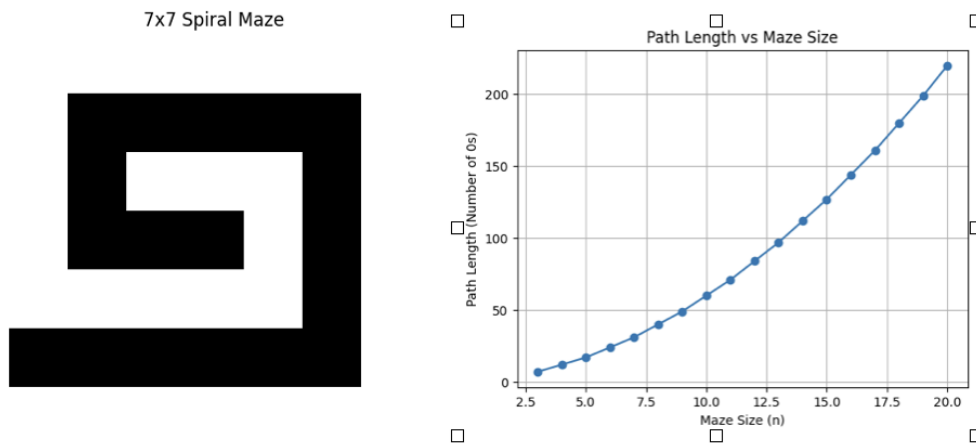

Figure 5: Consider a maze with a spiral wall - the white cells indicate traversable floor, and black indicate intraversable wall. Simulating these environments shows that the maximal length of path (white cells) in the environment grows as  $\approx \frac{1}{2}n^2$ .

*Proof.* Consider a fragment with the maximum spiral path (e.g. Figure 5). The length of this path scales quadratically with  $n$ . In particular, following a spiral path takes a series of four legs at each depth, and the length of every other leg reduces by two (one for the wall and one for the path itself).

864 This yields

$$\begin{aligned}
 865 \quad n + \sum_{i=0}^{\lfloor n/2 \rfloor - 1} 2(n - 2i - 1) &= \frac{n}{2} 2n - 4 \frac{(n/2)(n/2 + 1)}{2} + O(n) \\
 866 \quad & \\
 867 \quad & \\
 868 \quad & \\
 869 \quad & \\
 870 \quad & \\
 871 \quad & \\
 872 \quad & \\
 873 \quad & \\
 874 \quad & \\
 875 \quad & \\
 876 \quad & \\
 877 \quad & \\
 878 \quad & \\
 879 \quad & \\
 880 \quad & \\
 881 \quad & \\
 882 \quad & \\
 883 \quad & \\
 884 \quad & \\
 885 \quad & \\
 886 \quad & \\
 887 \quad & \\
 888 \quad & \\
 889 \quad & \\
 890 \quad & \\
 891 \quad & \\
 892 \quad & \\
 893 \quad & \\
 894 \quad & \\
 895 \quad & \\
 896 \quad & \\
 897 \quad & \\
 898 \quad & \\
 899 \quad & \\
 900 \quad & \\
 901 \quad & \\
 902 \quad & \\
 903 \quad & \\
 904 \quad & \\
 905 \quad & \\
 906 \quad & \\
 907 \quad & \\
 908 \quad & \\
 909 \quad & \\
 910 \quad & \\
 911 \quad & \\
 912 \quad & \\
 913 \quad & \\
 914 \quad & \\
 915 \quad & \\
 916 \quad & \\
 917 \quad & \\
 \end{aligned} \tag{3}$$

□

**Theorem 2.** *In the an  $n \times n$  maze, the expected number of steps taken by SBP may exceed the expected number of steps of an optimal policy by  $\Omega(n^2)$ .*

*Proof.* Build a fragment by adjoining an empty room and a spiral by a single door at a corner. Now connect the two fragments by adding a door between the empty rooms in the opposite corner. Assume the size of the empty rooms is such that the optimal algorithm can find the exit with probability  $1/2$  by checking each empty room, but the SBP algorithm must explore entirely the first fragment that it enters. With probability  $3/4$ , the exit is not in the first empty room, so it must explore the spiral, which takes time  $\Omega(n^2)$  to fully explore by Lemma 1. The spiral also must be exited, so around  $n^2$  steps are spent when the exit is in the other empty room (in this case the optimal planner finds immediately by checking each room). Since the optimal planner takes only a constant number of steps to check each empty room, and then behaves identically to the SBP, the expected cost when the exit is in any other location is asymptotically the same, so the expected cost difference is roughly  $\frac{1}{4}n^2 = \Omega(n^2)$ . □

**Theorem 3.** *The number of steps to fully explore a maze is  $O(n^2)$ .*

*Proof.* Consider a  $v$ -vertex connected graph. The maximum width (roughly achievable by the spiral) is  $v$ , leading to a naive bound of  $O(v^2) = O(n)$ . This can be improved to  $O(v)$  by running a depth-first search. Since there are 4 movement directions the degree of this graph is 4 meaning the maximum number of backtracks to a vertex is 3, which immediately gives  $4v$ . However, in a depth first search there is only one backtrack from each vertex is 1, which leads to an easy inductive proof that the bound is  $O(2v - 1)$  regardless of degree, yielding  $2n^2 - 1 = O(n^2)$ . Note that further improvements should be possible by considering the number of walls required to induce the worst-case topology. □

This implies that the Bayes-optimal policy has  $O(n^2)$  expected cost (since its *expected* cost must be at least as good as the *expected* cost of exhaustive search), regardless of the maze. Together, Lemma 1 and Theorem 3 demonstrate that the SBP heuristic does not damage the (asymptotic) expected cost in the worst maze.

**Theorem 4.** *Assume that an  $n \times n$  maze is fragmented in such a way that any time a fragment is entered, it can be fully explored before exiting, into  $c^2$  square  $(n/c) \times (n/2)$  fragments. The asymptotic expected cost is  $\Theta(n^2)$  in the worst such maze for the modular optimal and globally optimal policies.*

*Proof.* First, consider the global optimal policy. The additional requirements placed on the maze cannot make the  $O(n^2)$  bound in Theorem 3 worse, and we can get a matching lower bound by simply adjoining multiple spiral examples as in Lemma 1 and adding doors between them.

Now consider the modular optimal policy. It is clear that the globally optimal policy has an expected cost as least as low as the modular optimal policy (even in their respective worst mazes), by definition, so the  $\Omega(n^2)$  lower bound automatically carries over to the modular optimal policy. We assumed that the modular optimal policy takes the Bayes-optimal paths between fragments. This must be at least as good as the following strategy: mimic the global optimal policy, but any time a new fragment is entered, first explore it completely and return to the entrance. By Theorem 3, each such “extra” exploration detour takes at most  $2(\frac{n}{c})^2 - 1$  steps, and the return takes at most  $(\frac{n}{c})^2$  steps. The total is  $3(\frac{n}{c})^2 - 1$ . There are exactly  $c^2$  such detours, for  $4n^2 - c^2 = \Theta(n^2)$  extra steps. The global optimal policy also takes  $\Theta(n^2)$  steps.

□

918 Therefore, in the worst case the modular algorithm is inferior by at least a constant factor of the total  
919 search time in expectation. Examining the proof of Theorem 4 yields a factor of 2.5 over our upper  
920 bound in Theorem 3, but presumably this can be improved substantially since a lot of exploration is  
921 being redone after the detours.

922  
923 **Improving expected cost upper bounds** Substantial improvements to the worst-case cost bound  
924 in Theorem 3 are easy to obtain when the proof is applied to expected cost by e.g. noting that the  
925 depth-first search visits at least one new cell every two steps, meaning that there is clearly at least  
926 a 1/4 chance of finding the exit after  $n^2$  steps, or by noting that the true number of “vertices” is  
927 reduced by walls. These improvements seem to apply equally to the modular and global optimal  
928 policies, and probably do not affect our constants much.

929 For worst-case cost, the situation is similar. However, the worst-case cost analysis simplifies signif-  
930 icantly with the additional assumption that transitions between fragments are negligible (say, if they  
931 all branch off from a central room). This observation is trivial but worth stating explicitly:

932 **Theorem 5.** *When the cost to transition between fragments is negligible, each has one entrance,*  
933 *and there is no line-of-sight across fragments, the modular algorithm has the same worst-case step*  
934 *count as the optimal algorithm.*

935  
936 *Proof.* In the worst case, the optimal algorithm must explore each fragment, and since there is only  
937 one entrance to each fragment it is not possible to gain any advantage by exiting a fragment before  
938 it has been fully explored. □

939  
940  
941  
942  
943  
944  
945  
946  
947  
948  
949  
950  
951  
952  
953  
954  
955  
956  
957  
958  
959  
960  
961  
962  
963  
964  
965  
966  
967  
968  
969  
970  
971

972  
973  
974  
975  
976  
977  
978  
979  
980  
981  
982  
983  
984  
985  
986  
987  
988  
989  
990  
991  
992  
993  
994  
995  
996  
997  
998  
999  
1000  
1001  
1002  
1003  
1004  
1005  
1006  
1007  
1008  
1009  
1010  
1011  
1012  
1013  
1014  
1015  
1016  
1017  
1018  
1019  
1020  
1021  
1022  
1023  
1024  
1025

### C EXPERIMENTAL ENVIRONMENTS

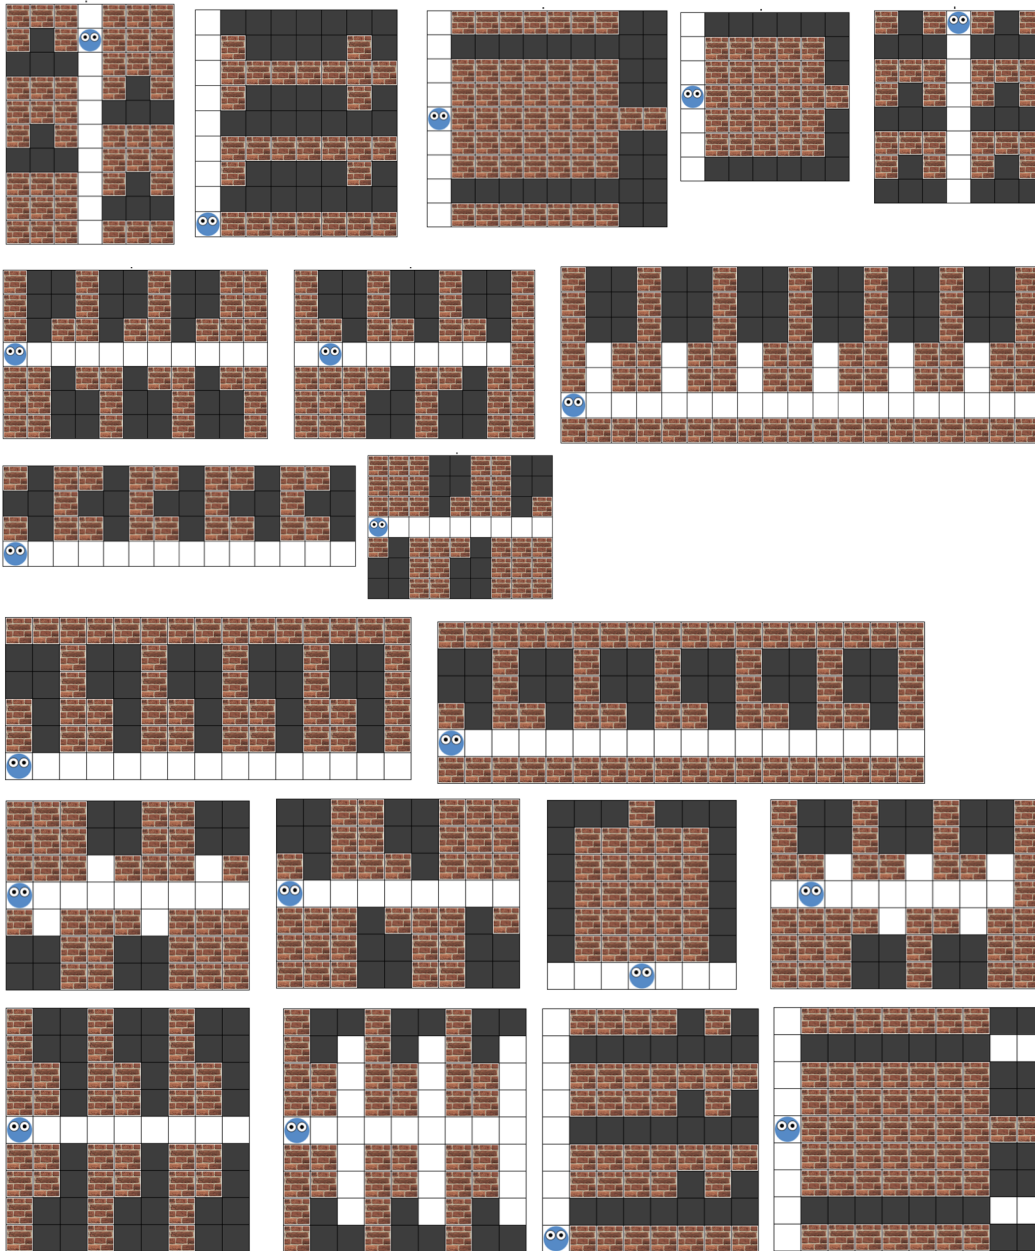

Figure 6: Environments used in Behavioral Experiment 1.

1026  
1027  
1028  
1029  
1030  
1031  
1032  
1033  
1034  
1035  
1036  
1037  
1038  
1039  
1040  
1041  
1042  
1043  
1044  
1045  
1046  
1047  
1048  
1049  
1050  
1051  
1052  
1053  
1054  
1055  
1056  
1057  
1058  
1059  
1060  
1061  
1062  
1063  
1064  
1065  
1066  
1067  
1068  
1069  
1070  
1071  
1072  
1073  
1074  
1075  
1076  
1077  
1078  
1079

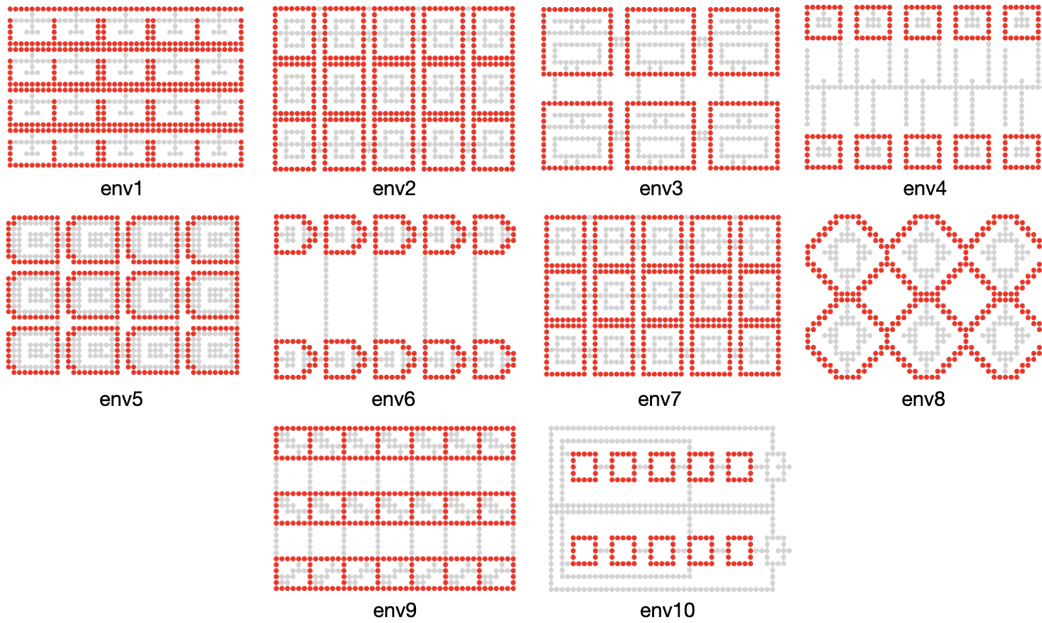

Figure 7: Environments used in Simulation Experiment 2.

## D ADDITIONAL RESULTS - SIMULATION EXPERIMENT

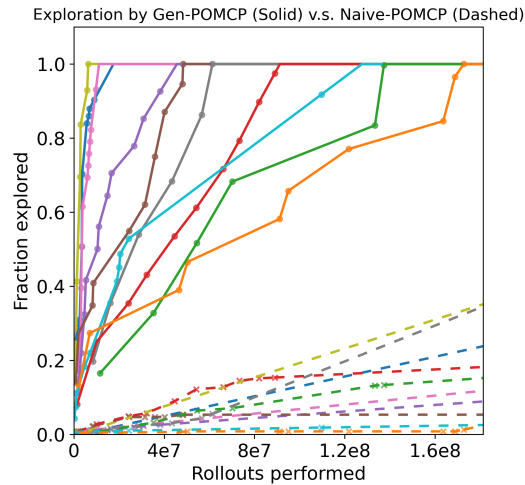

Figure 8: The fractions of each environment searched by Gen-POMCP and Naive-POMCP given identical computational budget. Gen-POMCP requires fewer rollouts and saves computing costs. Each environment is shown in a different color (see also Figure 4.)

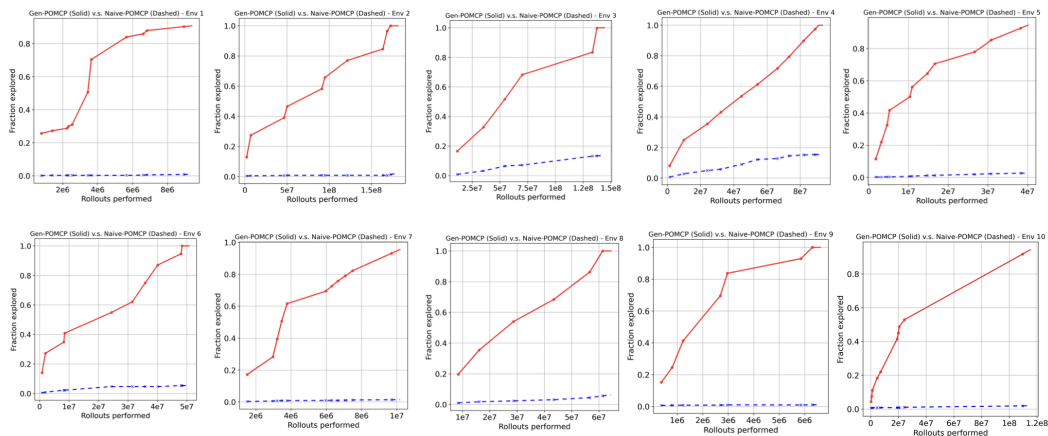

Figure 9: The fractions of each environment searched by Gen-POMCP and Naive-POMCP given identical computational budget. In each individual environment Gen-POMCP requires fewer rollouts and saves computing costs.)

## E THE EFFECT OF FREE PARAMETERS ON RESULTS

*Reconstruction accuracy.* As map accuracy decreases, the amount of online heuristic planning increases, and the amount of structure-based planning decreases. We implement this heuristic based prior work with Maze Search (Kryven et al 2024). A zero reconstruction accuracy entails a fully heuristic planning, regardless of planning cost.

*Planning cost.* As planning cost increases the units become smaller, leading to more localized search. A negligible planning cost paired with a high reconstruction accuracy reduces the model to a global planner. A high accuracy and high planning cost leads to a fully structure-based planning (the population level model used in the paper)

Dissociating between these parameters in a human experiment requires a complex targeted design, beyond the scope of the current work. As our goal is to test whether people use structure-based

1134 planning, as opposed to global search considered in previous work, we use a population-level model  
 1135 with high reconstruction accuracy and low planning costs. This leads the model to plan within single  
 1136 units intended by design (rather than grouping them) and maximizes the amount of discriminating  
 1137 decisions between structure-based and global planning.  
 1138

1139 **F GENERALIZING TO ACROSS LLM ARCHITECTURES**  
 1140

1141 In the paper, we used GPT-4 to build a proof-of-concept implementation for the GMM, originally  
 1142 chosen due to its strong code-generation abilities. However, we clarify that the choice of LLM model  
 1143 and prompting strategy are not critical to our framework’s results. The primary contribution of our  
 1144 work is showing that human planning in structured environments relies on integrating two cogni-  
 1145 tive principles – (1) compressed cognitive maps that leverage redundant structure (implemented in  
 1146 GMM) and (2) policy reuse (implemented in SBP).

1147 Below we show that GMM can be implemented with different LLM architectures. To do this, we  
 1148 show experimental results producing similar reconstructions by using different LLMs as a backend:  
 1149 GPT-4, Gemini-2.5-flash, Llama-3.3-70B, and Kimi-K2-Instruct-0905. Furthermore, we present  
 1150 results from two different prompting strategies (one-step prompt and multi-step prompts), showing  
 1151 that the exact prompt wording is not critical to producing the given results.  
 1152

1153 **F.1 SINGLE PROMPT**  
 1154

1155 **Input map**

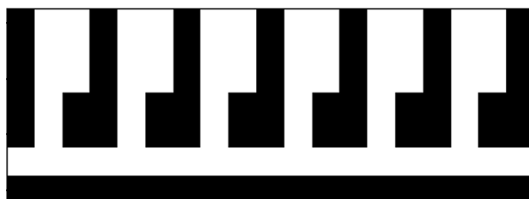

1163  
1164  
1165 **Top scoring unit candidate**

1166 GPT-4, Gemini-2.5-flash, Llama-3.3-70B      Kimi-K2-Instruct-0905

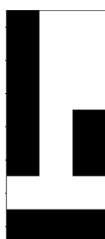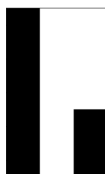

1176  
1177 **Reconstructed map**

1178 GPT-4, Gemini-2.5-flash, Llama-3.3-70B      Kimi-K2-Instruct-0905

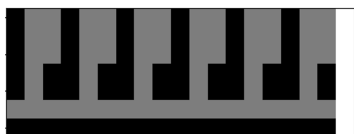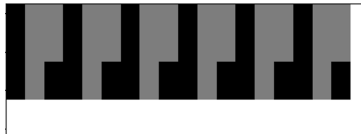

1185  
1186  
1187

1188 F.2 MULTI PROMPT  
1189

1190 **Input map**

1191 Complete input map  
1192

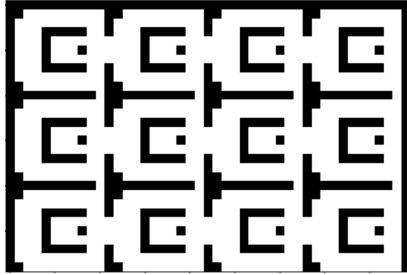

1193 Partial input map

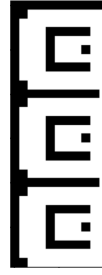

1203 **Top scoring unit candidate**

1204 GPT-4, Gemini-2.5-flash, Llama-3.3-70B

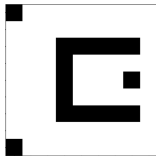

1205 Kimi-K2-Instruct-0905

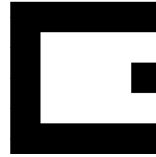

1213 **Reconstructed map**

1214 GPT-4, Gemini-2.5-flash, Llama-3.3-70B

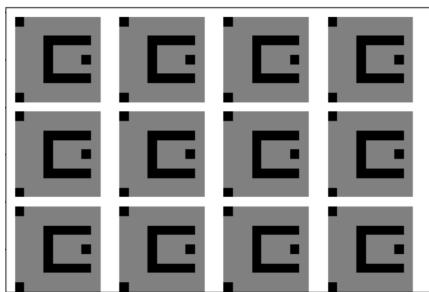

1215 Kimi-K2-Instruct-0905

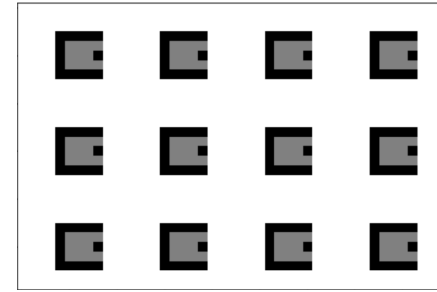

1226 G PROMPTS

1227 G.1 ONE-STEP PROMPT FOR GMM  
1228

1229 The Single Prompt GMM identifies the unit along with the reconstruction program using one prompt  
1230 to the LLM. The prompt describes the task as a two-step procedure: first identify the repeating unit,  
1231 then complete and return a runnable Python program that contains both the unit as a 2D array and  
1232 the reconstruction function.  
1233  
1234

1235 System prompt:

1236 You are a designer's assistant, skilled in noticing patterns,  
1237 combining fragments into a patterns, and extrapolating them. You  
1238 are skilled in identifying the underlying structure of a pattern  
1239 and generating new fragments that fit the pattern. You are also  
1240 skilled at writing Python code.  
1241

User prompt:

1242  
1243  
1244  
1245  
1246  
1247  
1248  
1249  
1250  
1251  
1252  
1253  
1254  
1255  
1256  
1257  
1258  
1259  
1260  
1261  
1262  
1263  
1264  
1265  
1266  
1267  
1268  
1269  
1270  
1271  
1272  
1273  
1274  
1275  
1276  
1277  
1278  
1279  
1280  
1281  
1282  
1283  
1284  
1285  
1286  
1287  
1288  
1289  
1290  
1291  
1292  
1293  
1294  
1295

There are two steps to this task. In Step 1, you will be given an input (a map) and asked to identify its constituent units. The input is a matrix, elements of which can take values 1 and 0. Your task is to identify a repeating unit in this input.

To be considered a repeating unit, the unit does not have to tile the space exactly, but it must appear at least twice. The unit instances may be flipped horizontally or vertically, translated horizontally or vertically, and rotated by multiples of 90 degrees (i.e. 0, 90, 180, 270).

IMPORTANT:

1. Instances of the unit must NOT overlap in the original input.
2. The height and width of the unit need not be equal

Example 1.

Given input: {example input 1}  
The repeating unit is: {example unit 1}

Example 2.

Given input: {example input 2}  
The repeating unit is: {example unit 2}

Example 3.

Given input: {example input 3}  
The repeating unit is: {example unit 3}

In Step 2, you will write a function that attempts to identify all occurrences of the unit in the input. Return a list containing the indexical locations of the top left corner for each copy, along with whether to reflect the copy horizontally and the number of 90 degree counter-clockwise rotations (these operations together generate the dihedral group D4).

For instance, in the examples above, possible solutions include

Example 1.

Solution 1: {example 1 program 1}  
Solution 2: {example 1 program 2}

Example 2.

Solution 1: {example 2 program 1}  
Solution 2: {example 2 program 2}

```

1296 Given your unit and partition, the user will attempt to
1297 reconstruct the input using the following function:
1298
1299 def construct_copy(unit, reflect, rotations):
1300     if reflect:
1301         unit = np.flip(unit, 1)
1302         unit = np.rot90(unit, rotations)
1303     return unit
1304
1305 def regenerate_pattern(unit, copies, input_dims):
1306     pattern = -1 * np.ones(shape=input_dims)
1307     for copy in copies:
1308         transformed = construct_copy(
1309             unit,
1310             copy["reflect"],
1311             copy["rotations"],
1312         )
1313         height, width = transformed.shape
1314         tli, tlj = copy["top left"]
1315         try:
1316             pattern[tli:tli+height, tlj:tlj+width] = transformed
1317         except:
1318             pass
1319     return pattern
1320
1321 We can test the success of this regeneration with
1322
1323 input_map = np.array(input_map)
1324 output = regenerate_pattern(
1325     unit,
1326     partition(),
1327     input_map.shape,
1328 )
1329
1330 Now is your turn. Propose a unit that can be used to reconstruct
1331 the given input. Respond by completing the following Python code:
1332
1333 input_map = {input map}
1334 # make sure to define all arrays as numpy arrays
1335 import numpy as np
1336 input_map = np.array(input_map)
1337
1338 unit = [ ... ]
1339 unit = np.array(unit)
1340
1341 def partition():
1342     copies = []
1343     # Place your code here. Let's think step by step
1344     return copies
1345
1346 Please include only code in you response, no text.'''

```

## 1346 G.2 MULTI-PROMPT GMM

1347  
1348 To improve GMM scalability on large maps, we introduce a two-step approach. The two steps are  
1349 implemented in two separate prompts, which adapt the strategy described in the previous section.  
The first prompt provides a part of the map and asks to identify a repeating unit. The second prompt

1350 asks the LLM to infer a reconstruction program for the complete map given the previously identified  
1351 unit.

1352  
1353 **System prompt:**

1354 You are a designer's assistant, skilled in noticing patterns,  
1355 combining fragments into a patterns, and extrapolating them. You  
1356 are skilled in identifying the underlying structure of a pattern  
1357 and generating new fragments that fit the pattern. You are also  
1358 skilled at writing Python code.

1359  
1360 **Unit Identification Prompt:**

1361 You will be given an input (a map) and asked to identify its  
1362 constituent units. The input is a matrix, elements of which can  
1363 take values 1 and 0. Your task is to identify a repeating unit in  
1364 this input, and ONLY output the unit as a 2D python array. DO NOT  
1365 include anything else in the completion.

1366 To be considered a repeating unit, the unit does not have to tile  
1367 the space exactly, but it must appear at least twice. The unit  
1368 instances may be flipped horizontally or vertically, translated  
1369 horizontally or vertically, and rotated by multiples of 90 degrees  
1370 (i.e. 0, 90, 180, 270).

1371  
1372 **IMPORTANT:**

- 1373 1. Instances of the unit must NOT overlap in the original input.  
1374 2. The height and width of the unit need not be equal

1375  
1376 **Example 1.**

1377 Given input: {example input 1}  
1378 The repeating unit is: {example unit 1}

1379  
1380 **Example 2.**

1381 Given input: {example input 2}  
1382 The repeating unit is: {example unit 2}

1383  
1384 **Example 3.**

1385 Given input: {example input 3}  
1386 The repeating unit is: {example unit 3}

1387 The input you are working with is the following map: {input map}

1388  
1389  
1390  
1391  
1392  
1393  
1394  
1395  
1396  
1397  
1398  
1399  
1400  
1401  
1402  
1403

1404 Reconstruction Program Prompt:  
1405

1406 You will write a function that attempts to identify all  
 1407 non-overlapping occurrences of the unit in the input. Return a  
 1408 list containing the indexical locations of the top left corner  
 1409 for each copy, along with whether to reflect the copy horizontally  
 1410 and the number of 90 degree counter-clockwise rotations (these  
 1411 operations together generate the dihedral group  $D_4$ ).

1412 Example 1.

1413 Given input: {example input 1}  
 1414 The unit is: {example unit 1}  
 1415 A solution is: {example 1 program 1}  
 1416 An alternative, more structured solution is: {example 1 program  
 1417 2}  
 1418

1419 Given input: {example input 2}  
 1420 The unit is: {example unit 2}  
 1421 A solution is: {example 2 program 1}  
 1422 An alternative, more structured solution is: {example 2 program  
 1423 2}  
 1424

1425 Given your unit and partition, the user will attempt to  
 1426 reconstruct the input using the following function:  
 1427

```

1428 def construct_copy(unit, reflect, rotations):
1429     if reflect:
1430         unit = np.flip(unit, 1)
1431         unit = np.rot90(unit, rotations)
1432     return unit
1433
1434 def regenerate_pattern(unit, copies, input_dims):
1435     pattern = -1 * np.ones(shape=input_dims)
1436     for copy in copies:
1437         transformed = construct_copy(
1438             unit,
1439             copy["reflect"],
1440             copy["rotations"],
1441         )
1442         height, width = transformed.shape
1443         tl_i, tl_j = copy["top left"]
1444         try:
1445             pattern[tl_i:tl_i+height, tl_j:tl_j+width] = transformed
1446         except:
1447             pass
1448     return pattern
  
```

1449 We can test the success of this regeneration with

```

1450
1451 input_map = np.array(input_map)
1452 output = regenerate_pattern(
1453     unit,
1454     partition(),
1455     input_map.shape,
1456 )
  
```

1457

```
1458 Now is your turn. Respond by completing the following Python
1459 code,
1460 1. include everything that is between START OF CODE and END OF
1461 CODE
1462 2. include the entire input map provided, do not use ... to omit
1463 3. ONLY fill partition(), do not use variables/functions that are
1464 not defined
1465 4. In the returned copies, follow the exact key names in the
1466 examples: 'top left', 'reflect', 'rotations'.
1467 4. DO NOT include anything else in the completion
1468
1469 # START OF CODE, make sure to define all arrays as numpy arrays
1470 import numpy as np
1471
1472 input_map = {input map}
1473 unit = {input unit}
1474 input_map = np.array(input_map)
1475 unit = np.array(unit)
1476
1477 def partition():
1478     copies = []
1479     # Place your code here. Let's think step by step
1480     return copies
1481 result = partition()
1482
1483 # END OF CODE
1484
1485
1486
1487
1488
1489
1490
1491
1492
1493
1494
1495
1496
1497
1498
1499
1500
1501
1502
1503
1504
1505
1506
1507
1508
1509
1510
1511
```

## 1512 G.3 IN-PROMPT EXAMPLES

1513

1514 **Example 1**

1515

1516 **Input map**

Unit

1517

1518

```
1519 [
1520   [1, 0, 1, 0],
1521   [0, 1, 0, 1],
1522   [0, 0, 0, 0],
1523   [1, 0, 1, 0],
1524   [0, 1, 0, 1]
1525 ]
```

```
[
  [1, 0],
  [0, 1]
]
```

1524

1525 **Reconstruction program 1:**

1526

```
1527 def partition():
1528     return [
1529         {"top left": (0,0), "reflect": False, "rotations": 0},
1530         {"top left": (0,2), "reflect": False, "rotations": 0},
1531         {"top left": (3,0), "reflect": False, "rotations": 0},
1532         {"top left": (3,2), "reflect": False, "rotations": 0},
1533     ]
```

1533

1534

1535

1536

1537

1538

1539

1540

1541

1542

1543

1544

1545

1546

1547

1548

1549

1550

1551

1552

1553

1554

1555

1556

1557

1558

1559

1560

1561

1562

1563

1564

1565

1566 **Example 2**

1567

1568 **Input map**

1569

1570

1571

1572

1573

1574

1575

1576

1577

1578

1579

1580

1581

1582 **Reconstruction program 1:**

1583

1584 `def partition():`1585  `return [`1586  `{"top left": (0,0), "reflect": False, "rotations": 0},`1587  `{"top left": (0,3), "reflect": False, "rotations": 0},`1588  `{"top left": (5,0), "reflect": True, "rotations": 2},`1589  `{"top left": (5,3), "reflect": True, "rotations": 2},`1590  `]`

1591

1592 **Reconstruction program 2:**

1593

1594 `def partition():`1595  `copies = []`1596  `for tl_i, tl_j in [(0,0), (0,3)]:`1597  `copies.append(`1598  `{"top left": (tl_i, tl_j), "reflect": False, "rotation": 0},`1599  `)`1600  `for tl_i, tl_j in [(5,0), (5,3)]:`1601  `copies.append(`1602  `{"top left": (tl_i, tl_j), "reflect": True, "rotations": 2},`1603  `)`1604  `return corners`

1605

1605 **Example 3**

1606

1607 **Input map**

1608

1609

1610

1611

1612

1613

1614

1615

1616

1617

1618

1619

**Unit**

[

[1,1,1],

[0,0,1],

[0,0,1],

[1,0,1]

]

[

[1,1],

[1,0],

[1,0]

]

## H PSEUDOCODE

---

**Algorithm 1** Single-prompt Generative Map Module

---

**Require:**  $I$  : Input map,  $t$  : Threshold,  $C$  : Number of completions,  $S$  : Likelihood function**Ensure:**  $\lambda$  : Generative program,  $u$  : Unit

```

1:  $S' \leftarrow 0$ 
2:  $\lambda \leftarrow ""$ 
3:  $u \leftarrow ""$ 
4: while  $S' < t$  do
5:   Generate a prompt from  $I$ 
6:   Send the prompt and receive  $C$  completions  $(\lambda_1, u_1), \dots, (\lambda_C, u_C)$ 
7:   Extract Python programs  $\{\lambda_1, \lambda_2, \dots, \lambda_C\}$ 
8:   for all  $\lambda_i \in \{\lambda_1, \dots, \lambda_C\}$  do
9:     if  $\lambda_i$  runs successfully then
10:       $S_i \leftarrow S(\lambda_i)$ 
11:     end if
12:   end for
13:    $(S', i) \leftarrow \max_i S_i$  ▷ highest scoring program based on likelihood
14:    $\lambda \leftarrow \lambda_i$ 
15:    $u \leftarrow u_i$ 
16: end while
17: return  $\lambda, u$ 

```

---



---

**Algorithm 2** Multi-prompt Generative Map Module

---

**Require:**  $I_c$  : Input map,  $I_p$  : Partial map,  $t$  : Threshold,  $C$  : Number of completions,  $S$  : Likelihood function**Ensure:**  $\lambda$  : Generative program,  $u$  : unit

```

1:  $S' \leftarrow 0$ 
2:  $\lambda \leftarrow ""$ 
3:  $u \leftarrow ""$ 
4: while  $S' < t$  do
5:   Generate a prompt from  $I_p$ 
6:   Send the prompt and receive  $C$  unit candidates  $u_1, \dots, u_C$ 
7:   for all  $u_i \in \{u_1, \dots, u_C\}$  do
8:     Generate a prompt from  $I_c$  and  $u_i$ 
9:     Send the prompt and receive program  $\lambda_i$ 
10:    if  $\lambda_i$  runs successfully then
11:       $S_i \leftarrow S(\lambda_i)$ 
12:    end if
13:  end for
14:   $(S', i) \leftarrow \max_i S_i$  ▷ highest scoring program based on likelihood
15:   $\lambda \leftarrow \lambda_i$ 
16:   $u \leftarrow u_i$ 
17: end while
18: return  $\lambda, u$ 

```

---

1620  
1621  
1622  
1623  
1624  
1625  
1626  
1627  
1628  
1629  
1630  
1631  
1632  
1633  
1634  
1635  
1636  
1637  
1638  
1639  
1640  
1641  
1642  
1643  
1644  
1645  
1646  
1647  
1648  
1649  
1650  
1651  
1652  
1653  
1654  
1655  
1656  
1657  
1658  
1659  
1660  
1661  
1662  
1663  
1664  
1665  
1666  
1667  
1668  
1669  
1670  
1671  
1672  
1673

1674  
1675  
1676  
1677  
1678  
1679  
1680  
1681  
1682  
1683  
1684  
1685  
1686  
1687  
1688  
1689  
1690  
1691  
1692  
1693  
1694  
1695  
1696  
1697  
1698  
1699  
1700  
1701  
1702  
1703  
1704  
1705  
1706  
1707  
1708  
1709  
1710  
1711  
1712  
1713  
1714  
1715  
1716  
1717  
1718  
1719  
1720  
1721  
1722  
1723  
1724  
1725  
1726  
1727

**Algorithm 3** Structure-Based Planner

---

**Require:**  $I$  : Input map,  $u$  : Unit,  $C_i$  : Unit copies  
**Ensure:**  $P$  : Agent path

- 1:  $(r, c) \leftarrow$  Initial agent position
- 2:  $C \leftarrow$  Empty set to track fully explored unit copies
- 3:  $\pi \leftarrow$  Policy for unit exploration based on location of entrance
- 4: **while**  $C$  does not contain all copies **do**
- 5:   Run POMCP on  $I$  until reaching an unexplored unit  $C_i$
- 6:   Identify the current entrance  $e$  into  $C_i$
- 7:   **if** policy from  $e$  found in  $\pi$  **then**
- 8:     Explore  $C_i$  with policy from  $\pi$
- 9:     Add  $C_i$  to  $C$
- 10:   **else**
- 11:     Run POMCP on  $C_i$  explore the unit
- 12:     Add new policy  $(e, \pi_e)$  to  $\pi$
- 13:     Add  $C_i$  to  $C$
- 14:   **end if**
- 15:    $o_1, \dots, o_m \leftarrow$  Exit locations of  $C_i$
- 16:   **for**  $o_j$  in  $\{o_1, \dots, o_m\}$  **do**
- 17:      $p_j \leftarrow$  compute penalty for escaping  $C_i$  from  $o_j$
- 18:   **end for**
- 19:   Run MCTS on  $C_i$  until reaching an exit to escape
- 20: **end while**
- 21: Run POMCP on  $I$  to explore the rest of the map
- 22: **return**  $P$

---

**Algorithm 4** POMCP for In-Unit Planning

---

|                                                                                                                                                                                                                                                                                                                                                                                                                                                                                                                                                                                                                                                                                                                                                                                                                                                                                                                                                                                                                                                                                                                                                                                                                                                                   |                                                                                                                                                                                                                                                                                                                                                                                                                                                                                                                                                                                                                                                                                                                                                                                                                                                                                                                                                                                                                                                                                                                                                                                                                                                                                                                                                                                                    |
|-------------------------------------------------------------------------------------------------------------------------------------------------------------------------------------------------------------------------------------------------------------------------------------------------------------------------------------------------------------------------------------------------------------------------------------------------------------------------------------------------------------------------------------------------------------------------------------------------------------------------------------------------------------------------------------------------------------------------------------------------------------------------------------------------------------------------------------------------------------------------------------------------------------------------------------------------------------------------------------------------------------------------------------------------------------------------------------------------------------------------------------------------------------------------------------------------------------------------------------------------------------------|----------------------------------------------------------------------------------------------------------------------------------------------------------------------------------------------------------------------------------------------------------------------------------------------------------------------------------------------------------------------------------------------------------------------------------------------------------------------------------------------------------------------------------------------------------------------------------------------------------------------------------------------------------------------------------------------------------------------------------------------------------------------------------------------------------------------------------------------------------------------------------------------------------------------------------------------------------------------------------------------------------------------------------------------------------------------------------------------------------------------------------------------------------------------------------------------------------------------------------------------------------------------------------------------------------------------------------------------------------------------------------------------------|
| <ol style="list-style-type: none"> <li>1: <b>procedure</b> SEARCH(<math>h</math>)</li> <li>2:   <b>if</b> <math>B(h) = \emptyset</math> <b>then</b></li> <li>3:     <b>return</b></li> <li>4:   <b>else</b></li> <li>5:     <b>repeat</b></li> <li>6:       <math>s_{\text{exit}} \sim B(h)</math></li> <li>7:       Simulate(<math>s_{\text{exit}}, h, 0</math>)</li> <li>8:       <b>until</b> Timeout</li> <li>9:       <b>return</b> <math>\arg \max_a V(ha)</math></li> <li>10:   <b>end if</b></li> <li>11: <b>end procedure</b></li> <li>12:</li> <li>13: <b>procedure</b> ROLLOUT(<math>s_{\text{exit}}, h, \text{depth}</math>)</li> <li>14:   <b>if</b> <math>\text{depth} &gt; \text{depth limit}</math> <b>then</b></li> <li>15:     <b>return</b> 0</li> <li>16:   <b>end if</b></li> <li>17:   <math>a \sim \pi_{\text{random}}</math></li> <li>18:   <math>(o, r) \sim \mathcal{G}(h, a)</math></li> <li>19:   <b>if</b> <math>o</math> contains <math>s_{\text{exit}}</math> <b>then</b></li> <li>20:     <b>return</b> <math>r</math></li> <li>21:   <b>else</b></li> <li>22:     <b>return</b> <math>r + \text{Rollout}(s_{\text{exit}}, ha, \text{depth} + 1)</math></li> <li>23:   <b>end if</b></li> <li>24: <b>end procedure</b></li> </ol> | <ol style="list-style-type: none"> <li>1: <b>procedure</b> SIMULATE(<math>s_{\text{exit}}, h, \text{depth}</math>)</li> <li>2:   <math>N(h) \leftarrow N(h) + 1</math></li> <li>3:   <b>if</b> <math>\text{depth} &gt; \text{depth limit}</math> <b>then</b></li> <li>4:     <b>return</b> 0</li> <li>5:   <b>end if</b></li> <li>6:   <b>if</b> <math>h \notin T</math> <b>then</b></li> <li>7:     <b>for</b> <math>a \in \{\text{up, right, bottom, left}\}</math> <b>do</b></li> <li>8:       <math>T(ha) \leftarrow (N_{\text{init}}(ha), V_{\text{init}}(ha), \emptyset)</math></li> <li>9:     <b>end for</b></li> <li>10:    <b>return</b> Rollout(<math>s_{\text{exit}}, h, \text{depth}</math>)</li> <li>11: <b>end if</b></li> <li>12:   <math>a \leftarrow \arg \max_a \left[ V(ha) + c \sqrt{\frac{\log N(h)}{N(ha)}} \right]</math></li> <li>13:   <math>(o, r) \sim \mathcal{G}(h, a)</math></li> <li>14:   <b>if</b> <math>o</math> contains <math>s_{\text{exit}}</math> <b>then</b></li> <li>15:     <math>N(ha) \leftarrow N(ha) + 1</math></li> <li>16:   <b>else</b></li> <li>17:     <math>r \leftarrow r + \text{Simulate}(s_{\text{exit}}, ha, \text{depth} + 1)</math></li> <li>18:   <b>end if</b></li> <li>19:   <math>V(ha) \leftarrow V(ha) + \frac{r - V(ha)}{N(ha)}</math></li> <li>20:   <b>return</b> <math>r</math></li> <li>21: <b>end procedure</b></li> </ol> |
|-------------------------------------------------------------------------------------------------------------------------------------------------------------------------------------------------------------------------------------------------------------------------------------------------------------------------------------------------------------------------------------------------------------------------------------------------------------------------------------------------------------------------------------------------------------------------------------------------------------------------------------------------------------------------------------------------------------------------------------------------------------------------------------------------------------------------------------------------------------------------------------------------------------------------------------------------------------------------------------------------------------------------------------------------------------------------------------------------------------------------------------------------------------------------------------------------------------------------------------------------------------------|----------------------------------------------------------------------------------------------------------------------------------------------------------------------------------------------------------------------------------------------------------------------------------------------------------------------------------------------------------------------------------------------------------------------------------------------------------------------------------------------------------------------------------------------------------------------------------------------------------------------------------------------------------------------------------------------------------------------------------------------------------------------------------------------------------------------------------------------------------------------------------------------------------------------------------------------------------------------------------------------------------------------------------------------------------------------------------------------------------------------------------------------------------------------------------------------------------------------------------------------------------------------------------------------------------------------------------------------------------------------------------------------------|

---

## I HUMAN EXPERIMENT - MAZE SEARCH TASK

This study runs best on a desktop/laptop.  
The study will **NOT** run on Safari, or a mobile device.

In this study you will look for an exit in a maze.

After this, you will be asked to provide demographic information.

The study is expected to take about 10 minutes.

Thanks for participating!

Figure 10: Introductory screen.

### INSTRUCTIONS (PLEASE READ CAREFULLY)

Your task is to exit the maze by reaching the red square, which is initially hidden.

You can move one square at a time by clicking on the white squares next to your character.

You cannot see through the walls. The squares you cannot see yet are black.

The exit could be behind any of the black squares.

A maze looks like this:

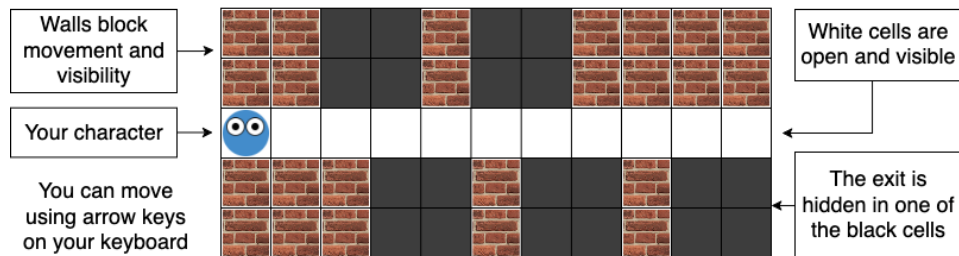

Figure 11: Instructions.

1782  
1783  
1784  
1785  
1786  
1787  
1788  
1789  
1790  
1791  
1792  
1793  
1794  
1795  
1796  
1797  
1798  
1799  
1800  
1801  
1802  
1803  
1804  
1805  
1806  
1807  
1808  
1809  
1810  
1811  
1812  
1813  
1814  
1815  
1816  
1817  
1818  
1819  
1820  
1821  
1822  
1823  
1824  
1825  
1826  
1827  
1828  
1829  
1830  
1831  
1832  
1833  
1834  
1835

### Practice Maze 1 of 5

Let's look at this map. There are some black squares, a brick wall, and your character.

The exit could be behind any of the black cells.

You can move your character by clicking one of adjacent white cells.

Find the exit and step on it to exit the maze.

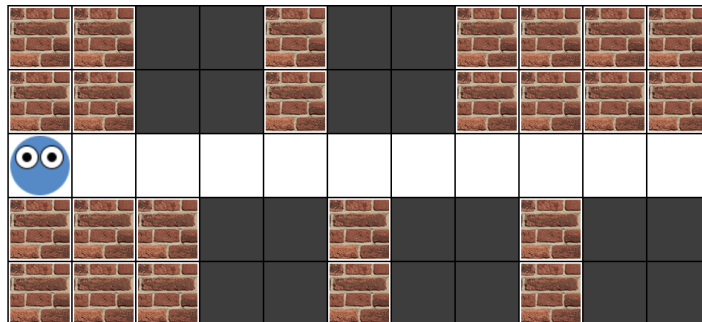

Figure 12: Practice (there are 5 practice trials).

1836  
1837  
1838  
1839  
1840  
1841  
1842  
1843  
1844  
1845  
1846  
1847  
1848  
1849  
1850  
1851  
1852  
1853  
1854  
1855  
1856  
1857  
1858  
1859  
1860  
1861  
1862  
1863  
1864  
1865  
1866  
1867  
1868  
1869  
1870  
1871  
1872  
1873  
1874  
1875  
1876  
1877  
1878  
1879  
1880  
1881  
1882  
1883  
1884  
1885  
1886  
1887  
1888  
1889

Please answer the quiz to move on.

Question 1: My task is to ..

- visit every square in the maze
- there is no specific task
- find the exit in each maze
- click as fast as possible

Question 2: Exits are always placed ...

- in the bottom left corner
- in one of the black cells
- some mazes have no exit
- there may be multiple exits

Question 3: Which image correctly shows unseen parts of the maze?

Image A  Image B

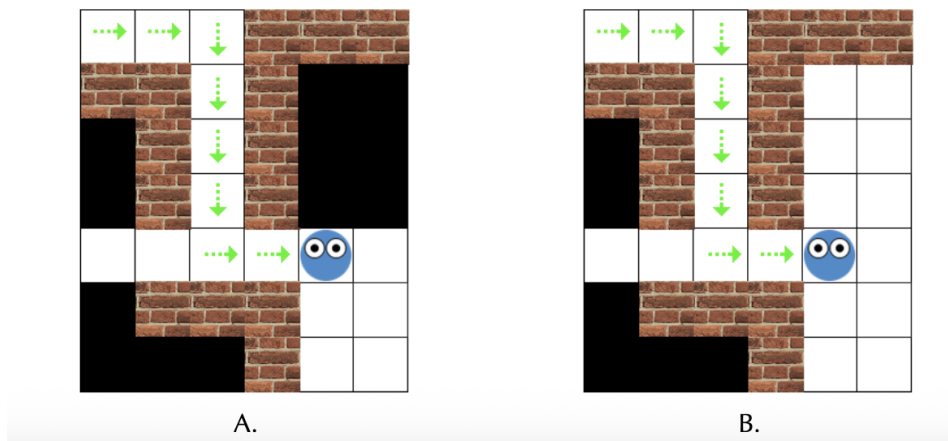

Figure 13: Comprehension Quiz.

1890  
1891  
1892  
1893  
1894  
1895  
1896  
1897  
1898  
1899  
1900  
1901  
1902  
1903  
1904  
1905  
1906  
1907  
1908  
1909  
1910  
1911  
1912  
1913  
1914  
1915  
1916  
1917  
1918  
1919  
1920  
1921  
1922  
1923  
1924  
1925  
1926  
1927  
1928  
1929  
1930  
1931  
1932  
1933  
1934  
1935  
1936  
1937  
1938  
1939  
1940  
1941  
1942  
1943

**Maze 1 of 21**

Find the exit and step on it to exit the maze.

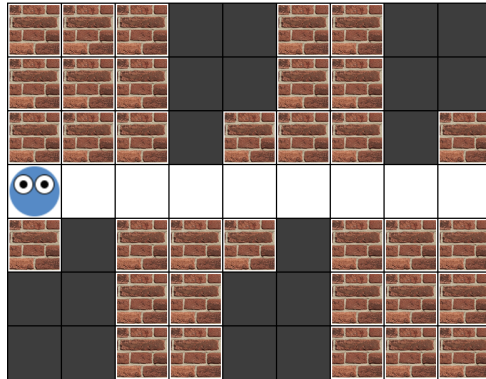

Figure 14: Experiment view.
